# Supplementary material for: BEEHAVE: a systems model of honeybee colony dynamics and foraging to explore multifactorial causes of colony failure
Source: J Appl Ecol. 2014 Mar 4;51(2):470–82. doi: 10.1111/1365-2664.12222 (PMC4283046; doi:10.1111/1365-2664.12222)
Supplement: Supplementary file 4 — Appendix S4. (JPEbecherSA4_Sensitivity.pdf): Complete sensitivity analyses. [file JPE-51-470-s004.pdf]

## Appendix S4: SENSITIVITY ANALYSES

Sensitivity analyses were done for the default setting and when varroa was added (i.e. *N\_Initial\_Mites\_Healthy*: 10, *N\_Initial\_Mites\_Infected*: 10). Each single parameter was multiplied by a factor ranging from 0.1 to 4 (x-axis). Mean colony size after 3 years was used as output (y-axis) (N = 10). Default values (i.e. factor = 1) are shown as a white circles. The effect of *Squadron\_Size*, which defines the number of foragers represented by a forager super-individual, was varied from 1 to 1000.

Without varroa

With varroa

- (i) "ABANDON\_POLLEN\_PATCH\_PROB\_PER\_S" (default probability = 0.00002 per second)

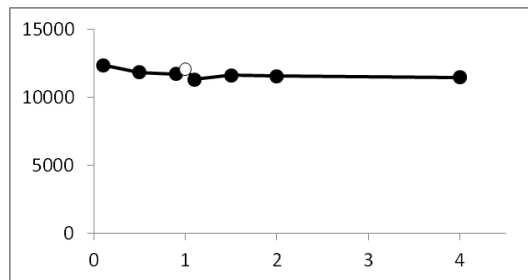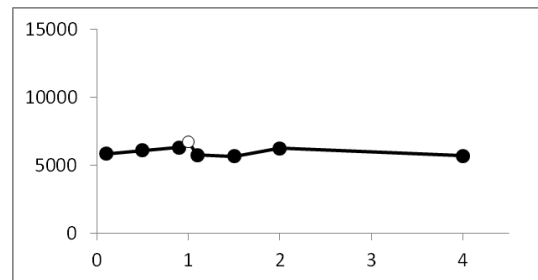

- (ii) "AFF\_BASE" (default = 21 days)

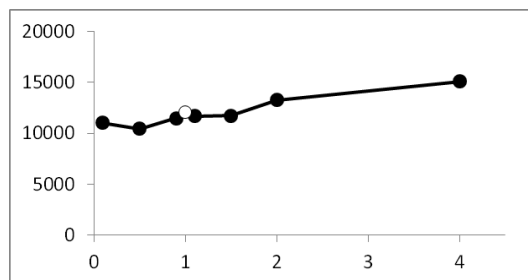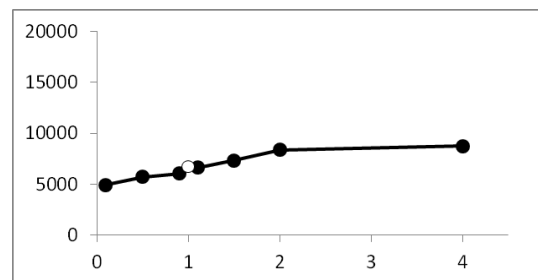

- (iii) "CONC\_G" (default concentration = 1.5 mol/l)

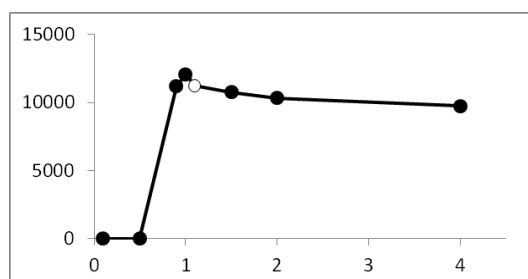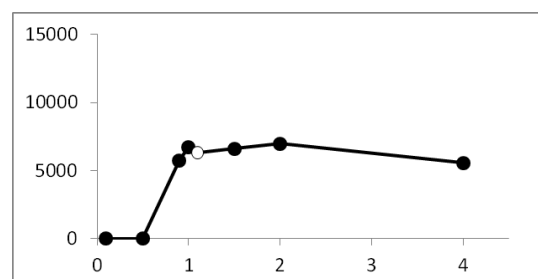

- (iv) "CONC\_R" (default concentration = 1.5 mol/l)

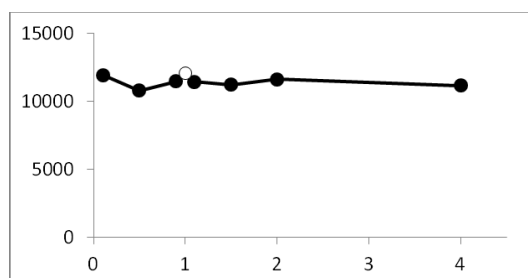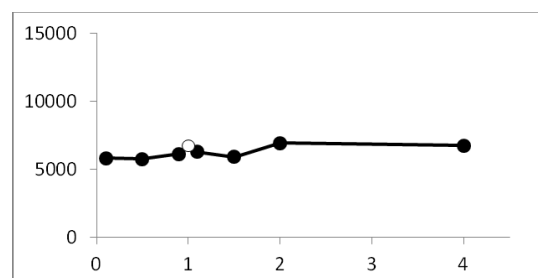

## Appendix S4

Without varroa

With varroa

(v) "CRITICAL\_COLONY\_SIZE\_WINTER" (default size = 4000 bees)

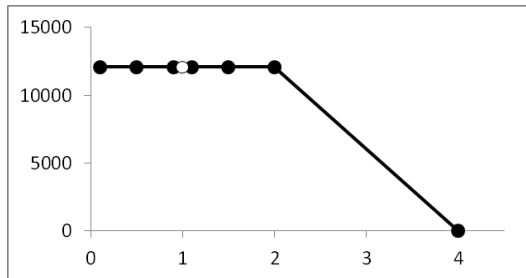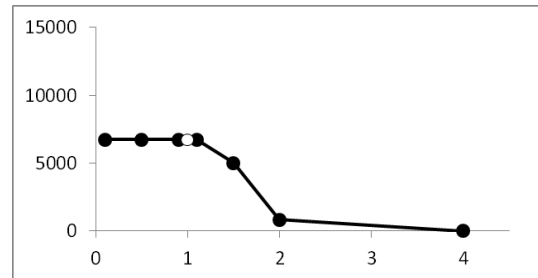

(vi) "CROPVOLUME" (default volume = 50  $\mu$ l)

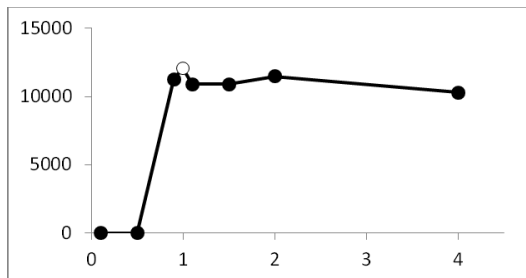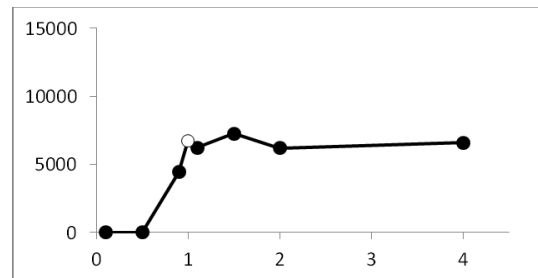

(vii) "DANCE\_SLOPE" (default = 1.16 dance circuits)

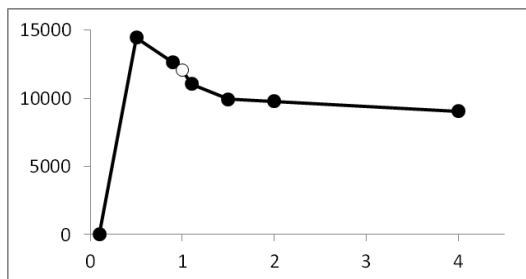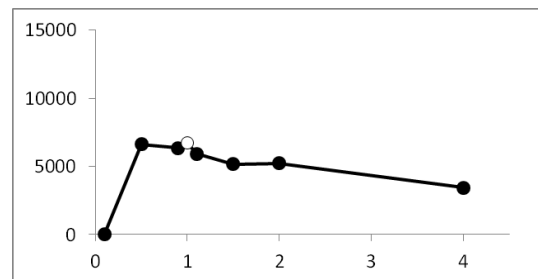

(viii) "DETECT\_PROB\_G" (default probability = 0.2)

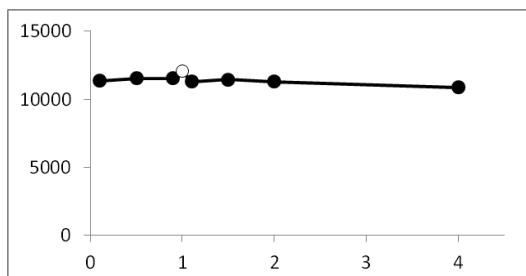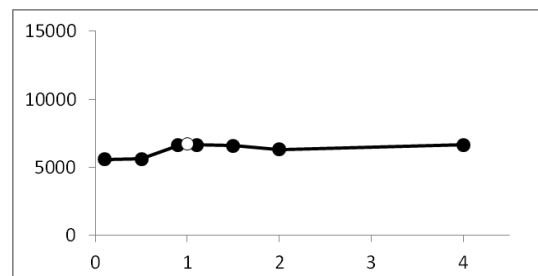

## Appendix S4

Without varroa

With varroa

(ix) "DETECT\_PROB\_R" (default probability = 0.2)

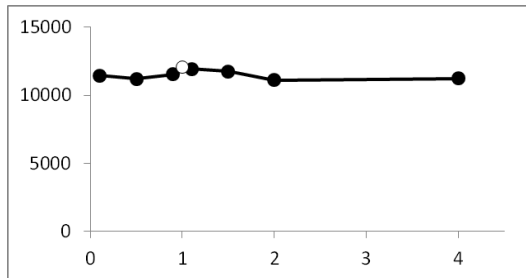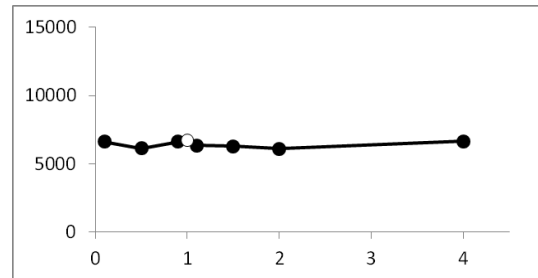

(x) "DISTANCE\_G" (default distance = 500 m)

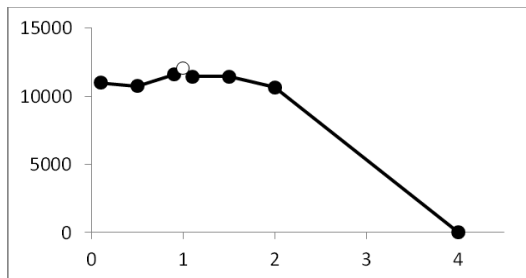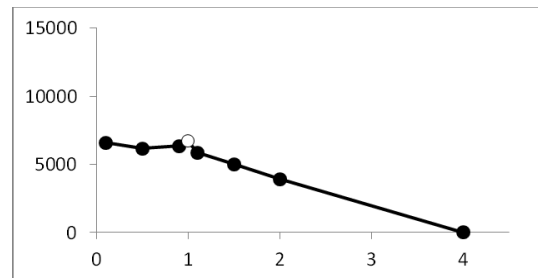

(xi) "DISTANCE\_R" (default distance = 1500 m)

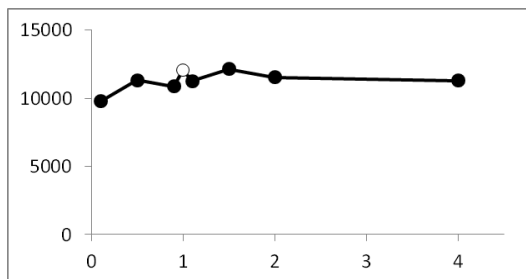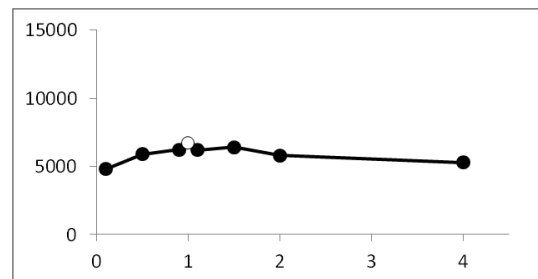

(xii) "DRONE\_EGGLAYING\_START" (default = day 115, i.e. 25<sup>th</sup> April)

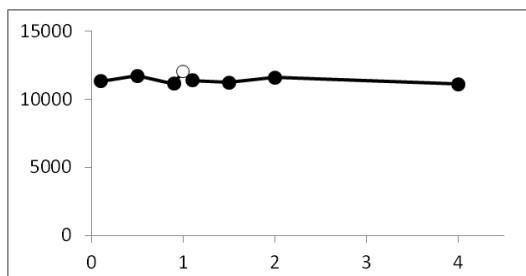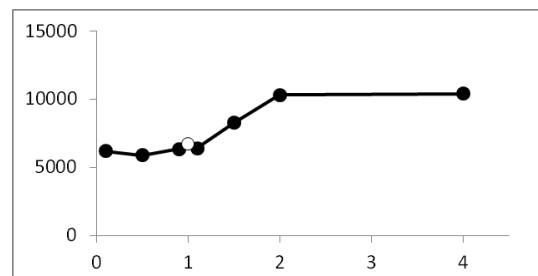

## Appendix S4

Without varroa

With varroa

(xiii) "DRONE\_EGGLAYING\_STOP" (default = day 240, i.e. 28<sup>th</sup> August)

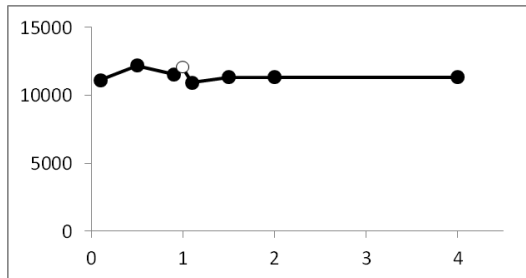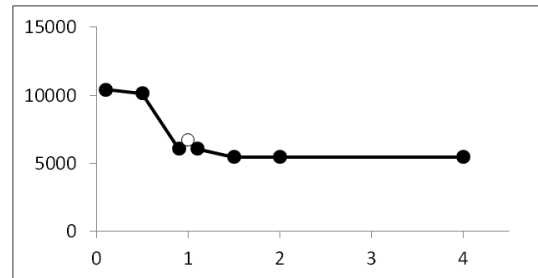

(xiv) "DRONE\_EGGS\_PROPORTION" (default proportion = 0.04)

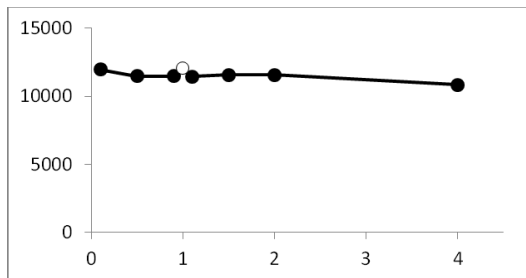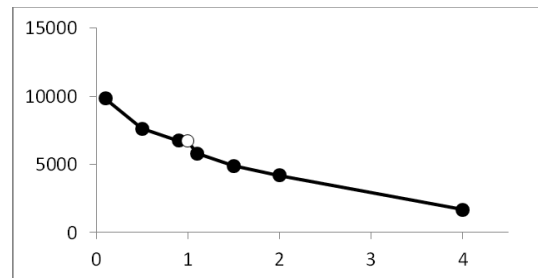

(xv) "DRONE\_LIFESPAN" (default = 37 days)

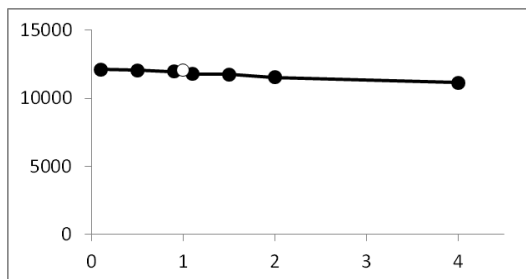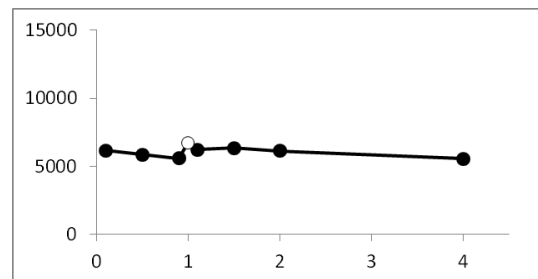

(xvi) "FIND\_DANCED\_PATCH\_PROB" (default probability = 0.5)

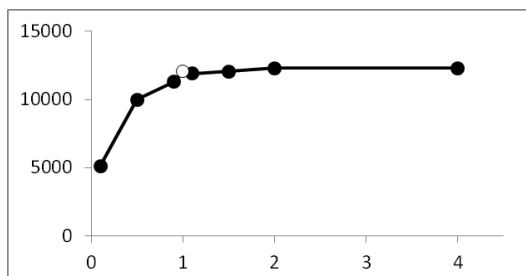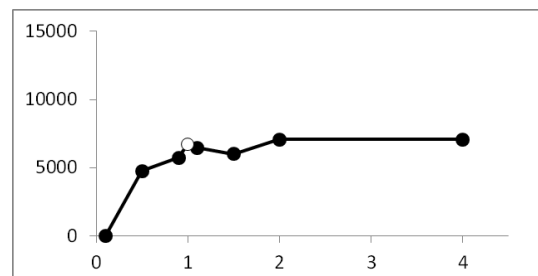

## Appendix S4

Without varroa

With varroa

(xvii) "FLIGHT\_VELOCITY" (default velocity = 6.5 m/s)

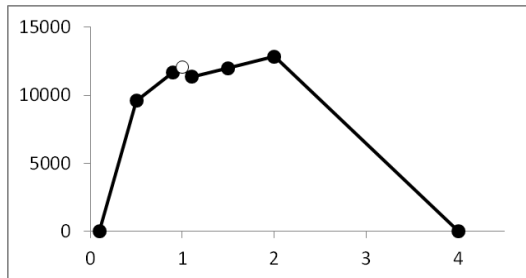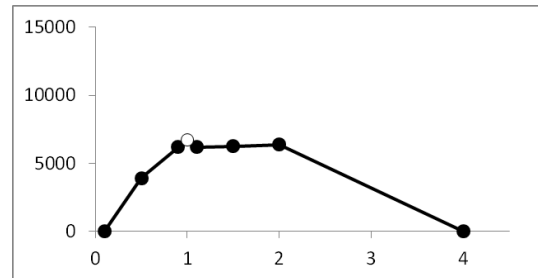

(xviii) "FLIGHTCOSTS\_PER\_m" (default = 0.000006 KJ/m)

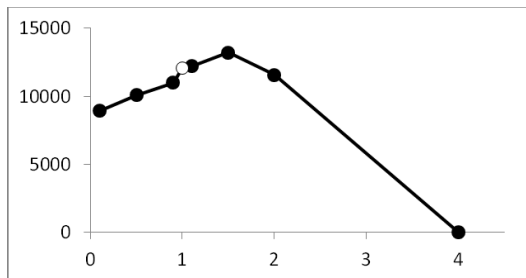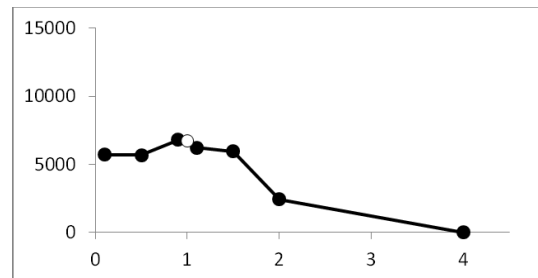

(xix) "FORAGER\_NURSING\_CONTRIBUTION" (default contribution = 0.2, relative to in-hive bees)

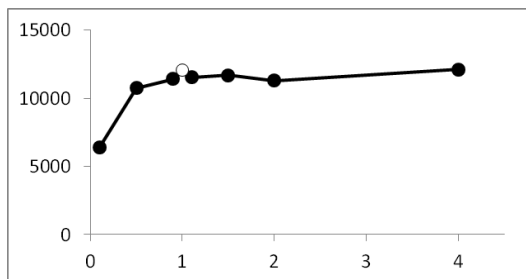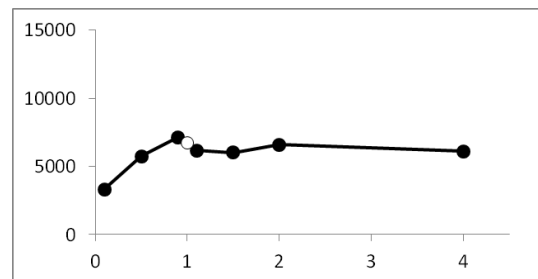

(xx) "FORAGING\_STOP\_PROB" (default probability = 0.3)

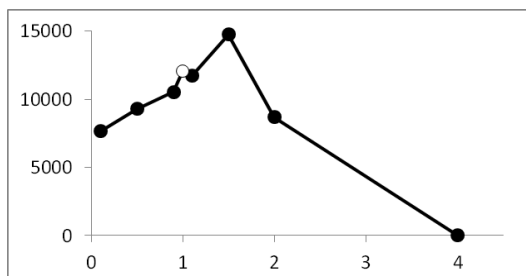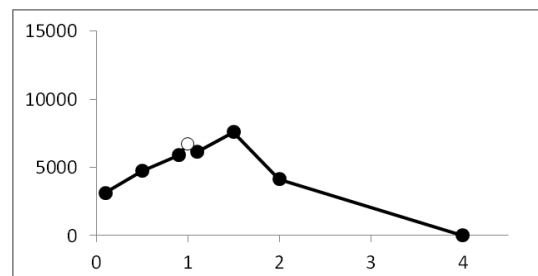

## Appendix S4

Without varroa

With varroa

(xxi) "LIFESPAN" (default = 290 days)

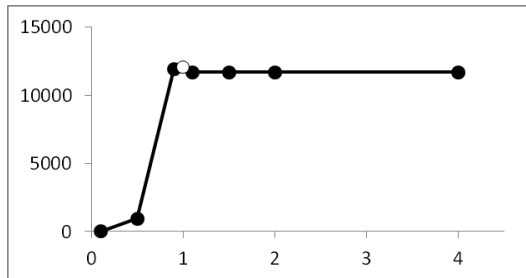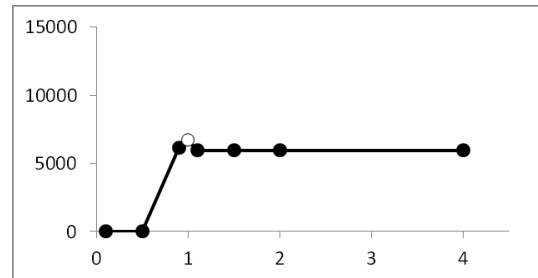

(xxii) "MAX\_BROOD\_NURSE\_RATIO" (default probability = 0.3 per emergence)

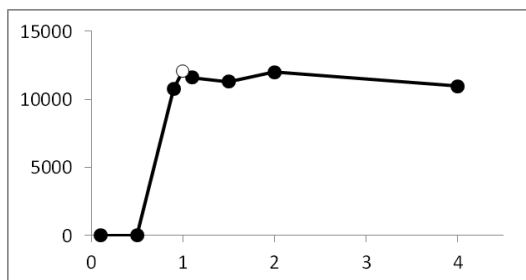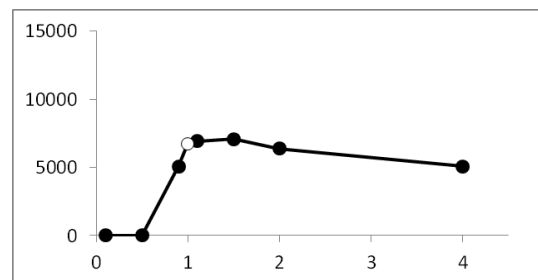

(xxiii) "MAX\_DANCE\_CIRCUITS" (default = 117 circuits)

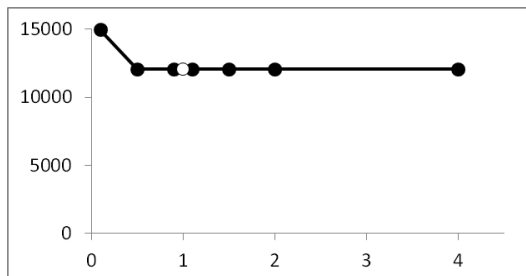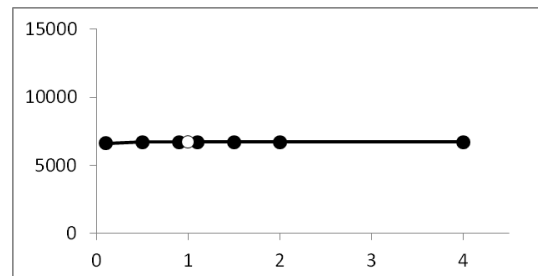

(xxiv) "MAX\_EGG\_LAYING" (default = 1600 eggs per day)

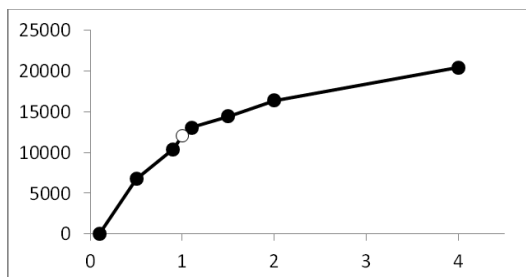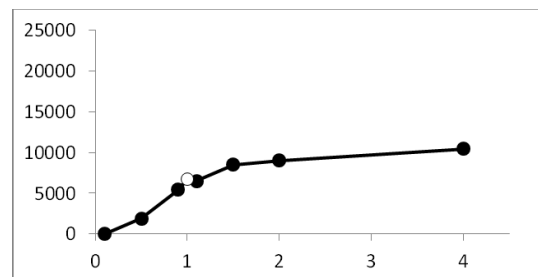

## Appendix S4

Without varroa

With varroa

(xxv) "MAX\_HONEY\_STORE\_kg" (default weight = 50 kg)

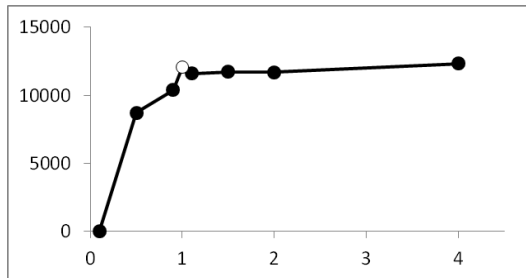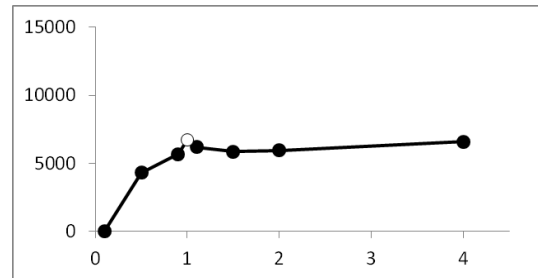

(xxvi) "MAX\_PROPORTION\_POLLEN\_FORAGERS" (default proportion = 0.8)

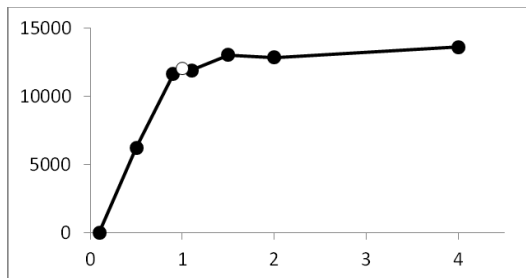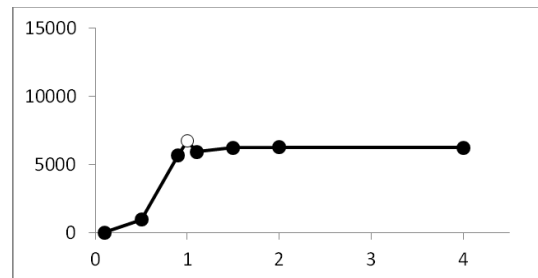

(xxvii) "MAX\_TOTAL\_KM" (default distance = 800 km)

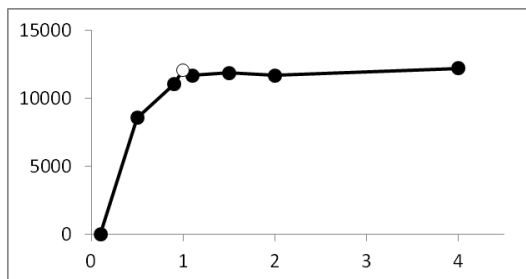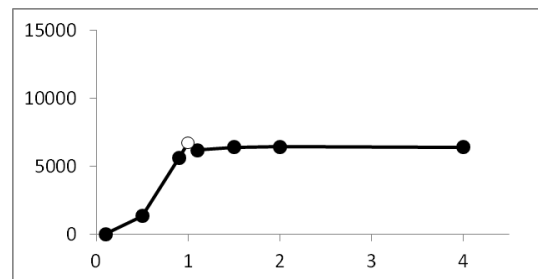

(xxviii) "MIN\_IDEAL\_POLLEN\_STORE" (default weight = 250 g)

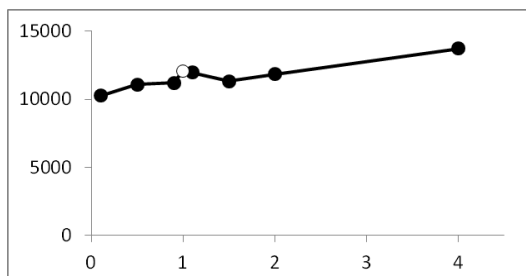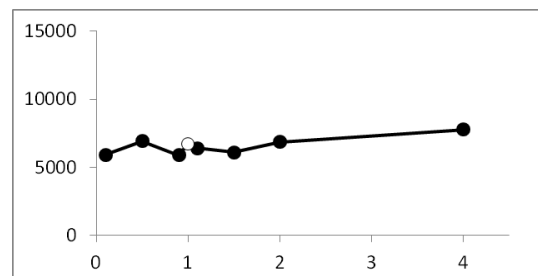

## Appendix S4

Without varroa

With varroa

(xxix) "MITE\_FALL\_DRONECELL" (default proportion = 0.2 per emergence)

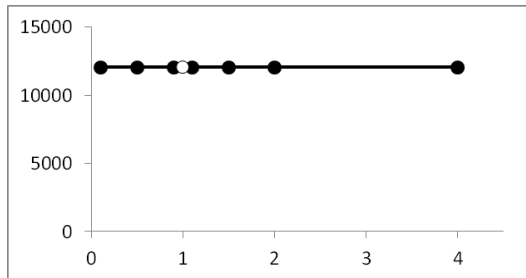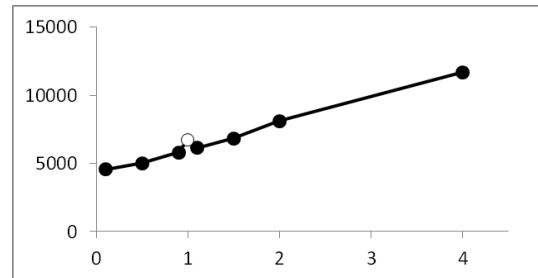

(xxx) "MITE\_FALL\_WORKERCELL" (default proportion = 0.3 per emergence)

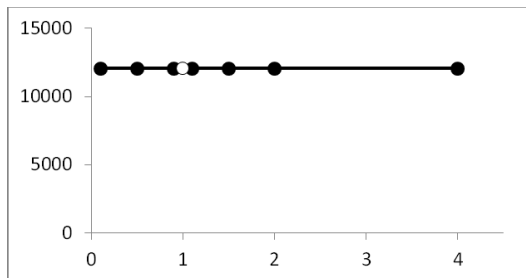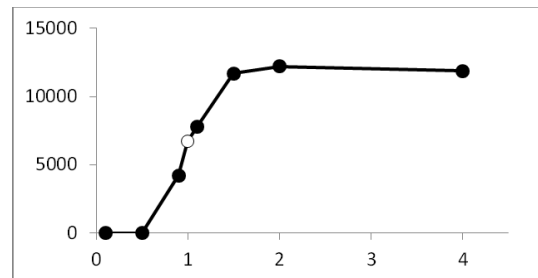

(xxxi) "MITE\_MORTALITY\_BROODPERIOD" (default mortality = 0.006 per day)

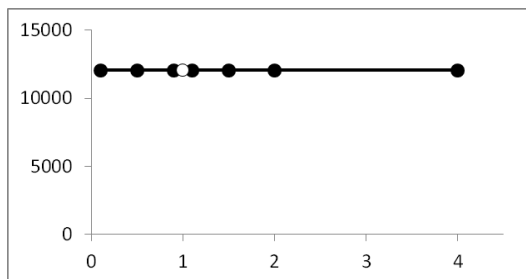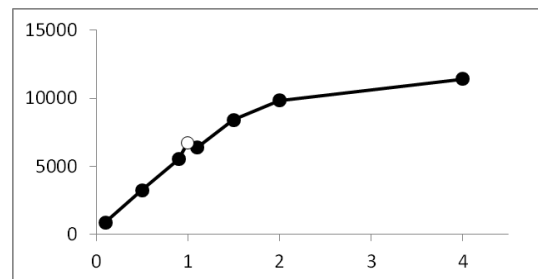

(xxxii) "MITE\_MORTALITY\_WINTER" (default mortality = 0.002 per day)

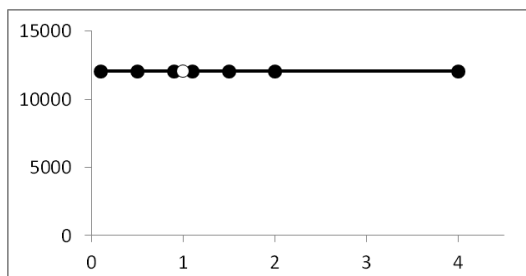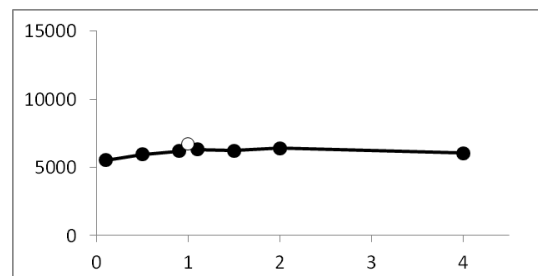

## Appendix S4

Without varroa

With varroa

(xxxiii) "MORTALITY\_DRONE\_EGGS" (default mortality = 0.064 per day)

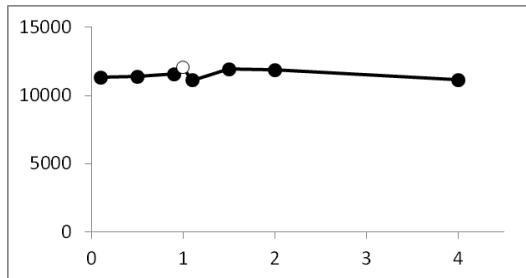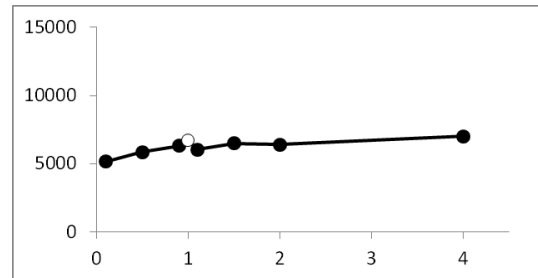

(xxxiv) "MORTALITY\_DRONE\_LARVAE" (default mortality = 0.044 per day)

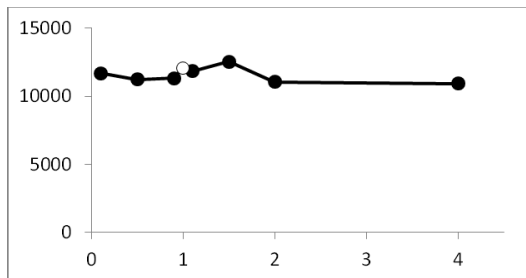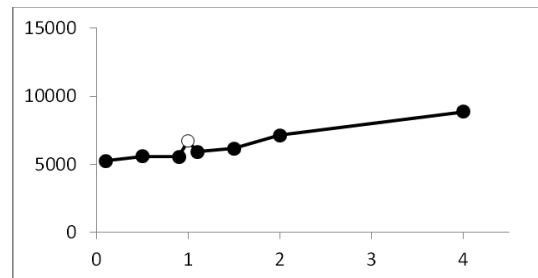

(xxxv) "MORTALITY\_DRONE\_PUPAE" (default mortality = 0.005 per day)

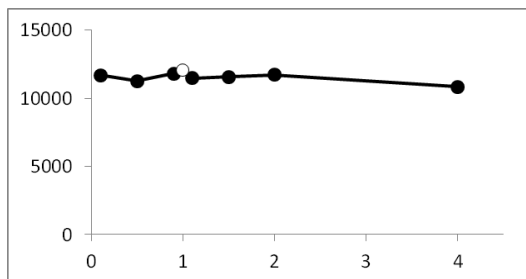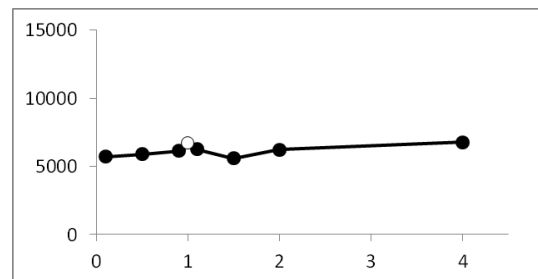

(xxxvi) "MORTALITY\_DRONES" (default mortality = 0.05 per day)

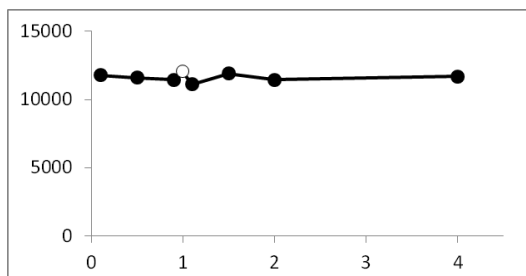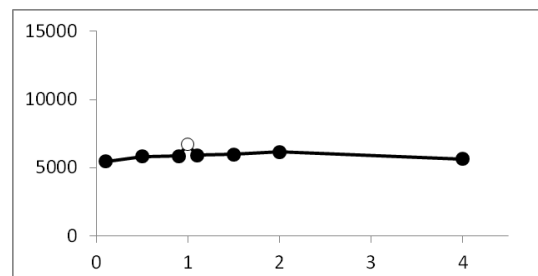

## Appendix S4

Without varroa

With varroa

(xxxvii) "MORTALITY\_EGGS" (default mortality = 0.03 per day)

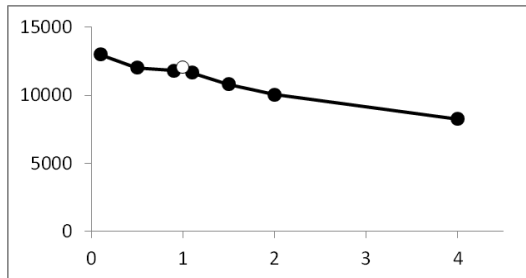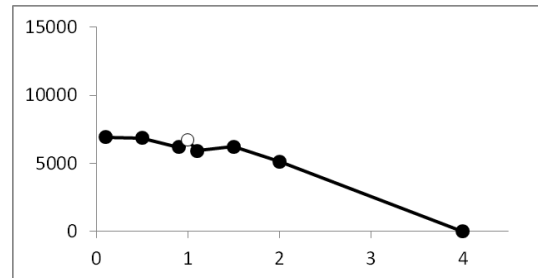

(xxxviii) "MORTALITY\_FOR\_PER\_SEC" (default mortality = 0.00001 per second)

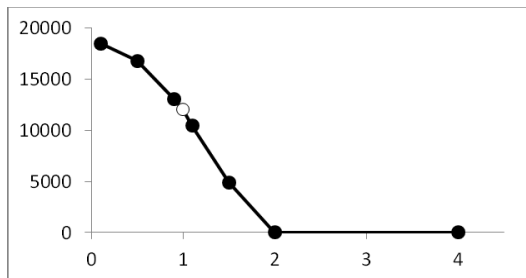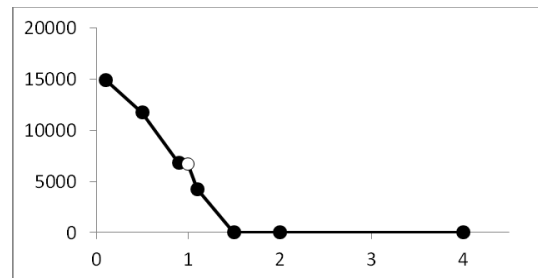

(xxxix) "MORTALITY\_INHIVE" (default mortality = 0.004 per day)

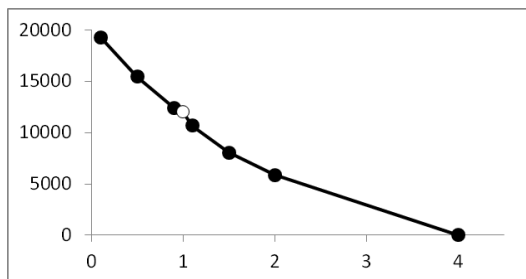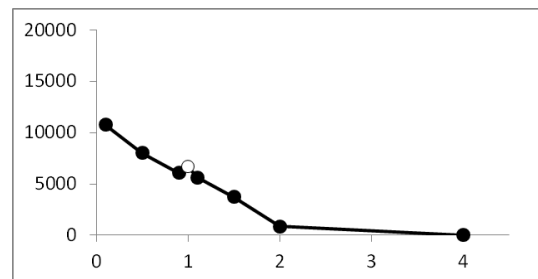

(xl) "MORTALITY\_LARVAE" (default mortality = 0.01 per day)

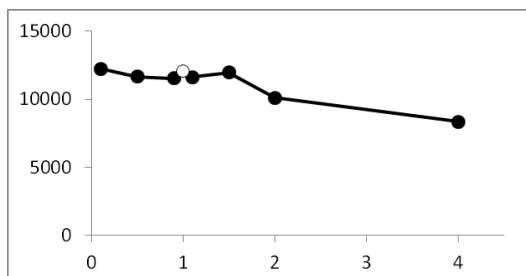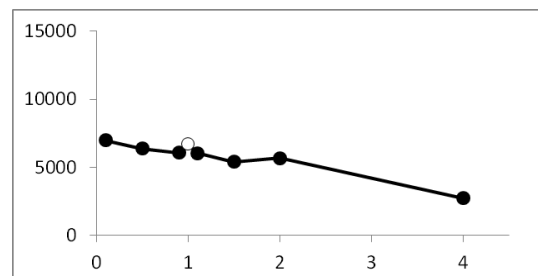

## Appendix S4

Without varroa

With varroa

(xli) "MORTALITY\_PUPAE" (default mortality = 0.001 per day)

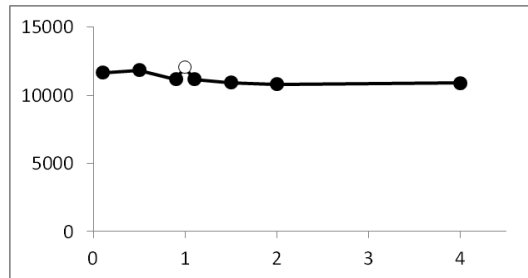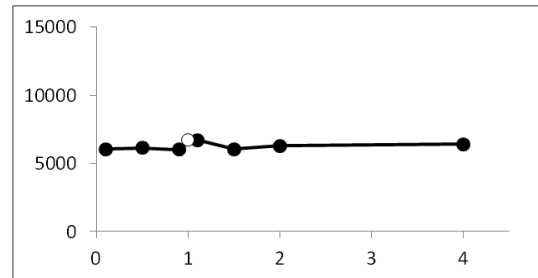

(xlii) "N\_INITIAL\_BEES" (default = 10000 bees)

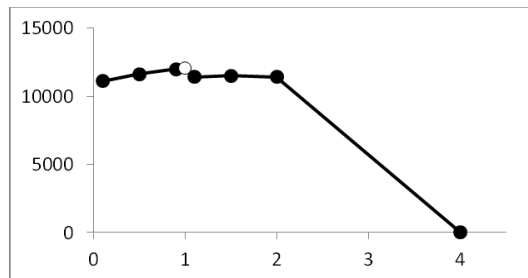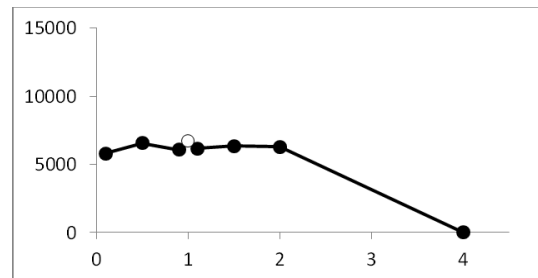

(xliii) "POLLEN\_DANCE\_FOLLOWERS" (default = 2 bees)

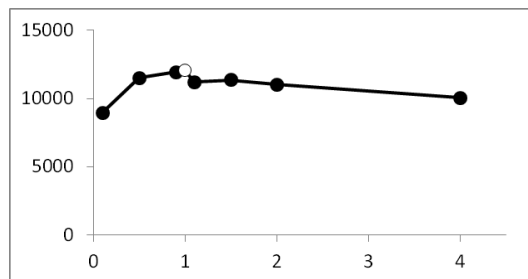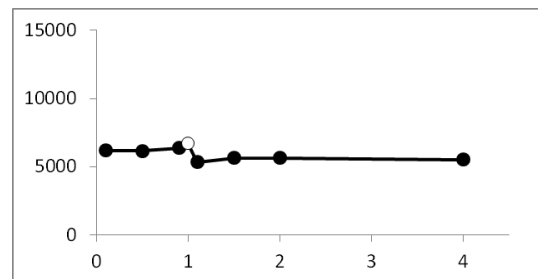

(xliv) "POLLEN\_G\_kg" (default weight = 1 kg)

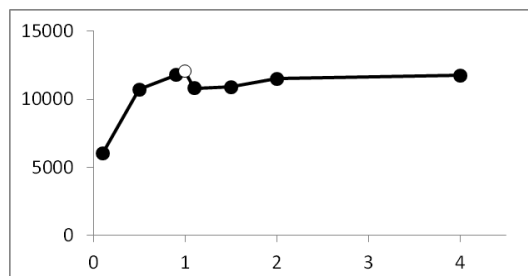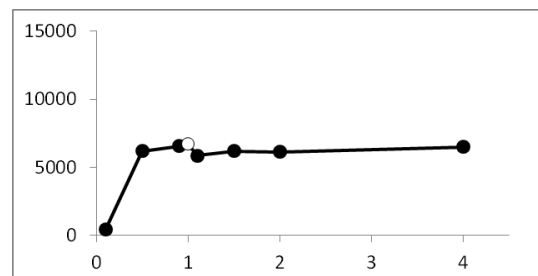

## Appendix S4

Without varroa

With varroa

(xlv) "POLLEN\_R\_kg" (default weight = 1 kg)

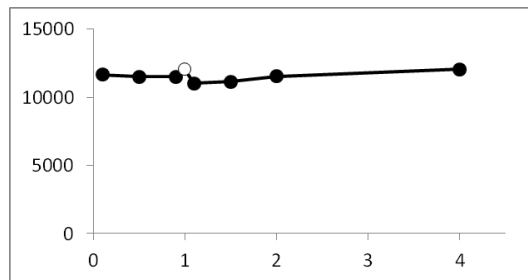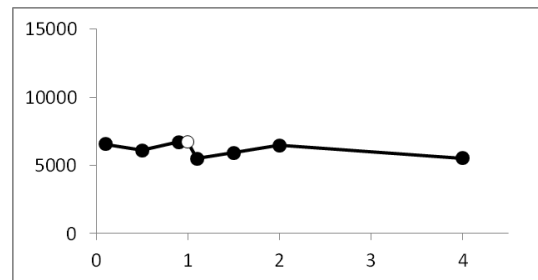

(xlvi) "POLLEN\_STORE\_INIT" (default weight = 100 g)

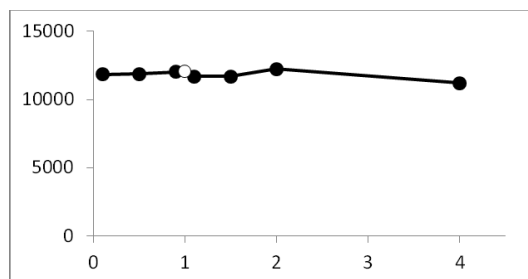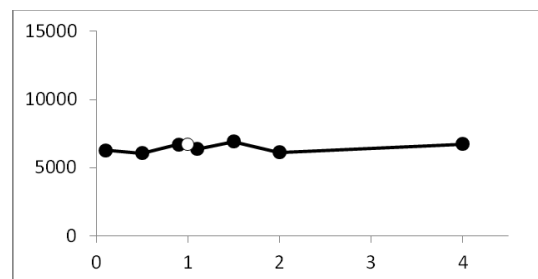

(xlvii) "POLLENLOAD" (default weight = 0.015 g)

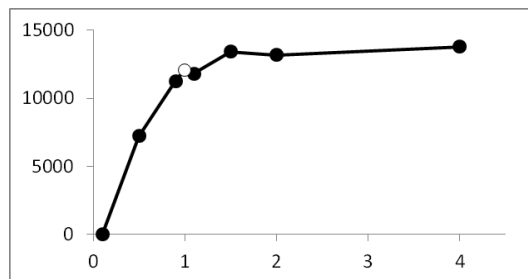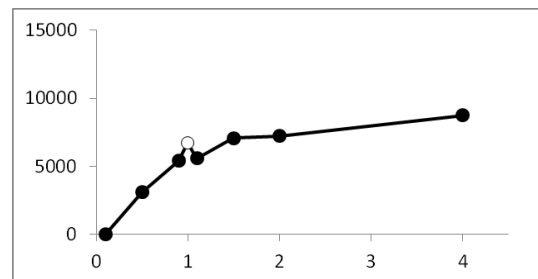

(xlviii) "PRE\_SWARMING\_PERIOD" (default = 3 days)

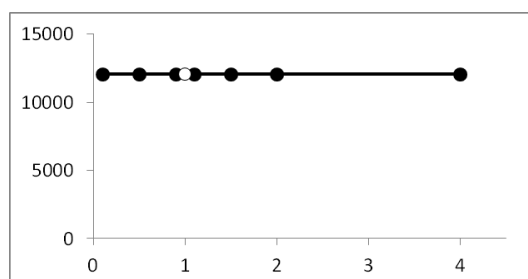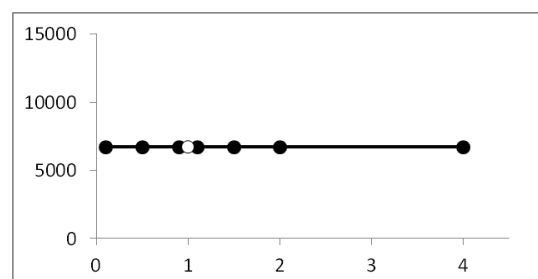

## Appendix S4

Without varroa

With varroa

(xlix) "PROTEIN\_STORE\_NURSES\_d" (default = 7 days)

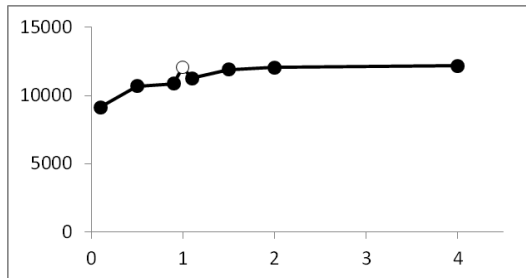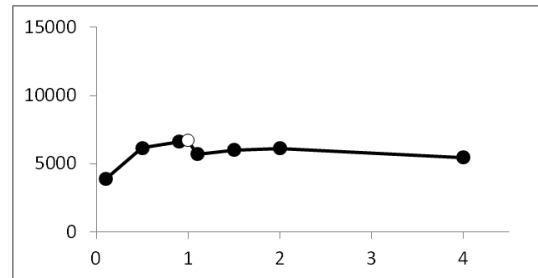

(l) "QUANTITY\_G\_l" (default amount = 20 litres)

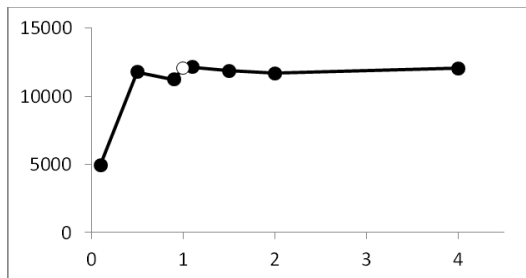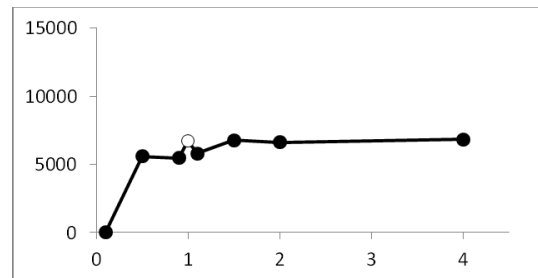

(li) "QUANTITY\_R\_l" (default amount = 20 litres)

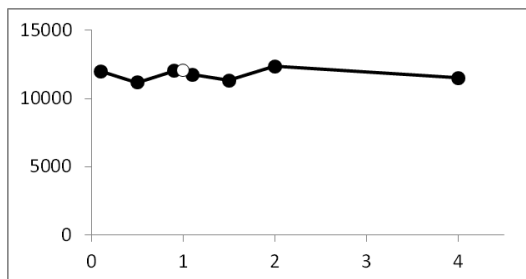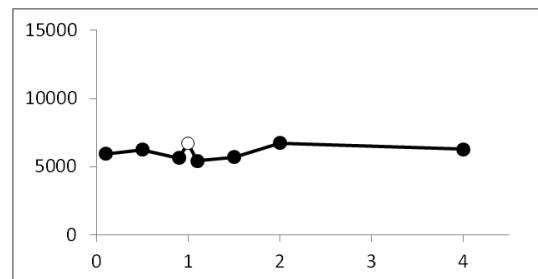

(lii) "SHIFT\_G" (default = -40)

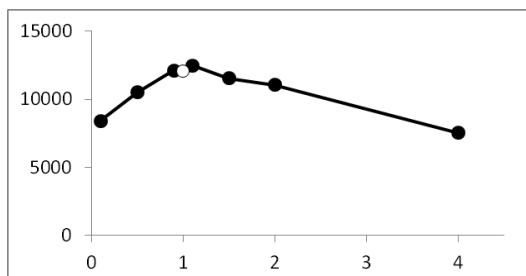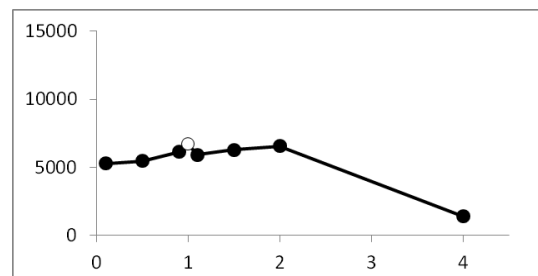

## Appendix S4

Without varroa

With varroa

(lii) "SHIFT\_R" (default = 30)

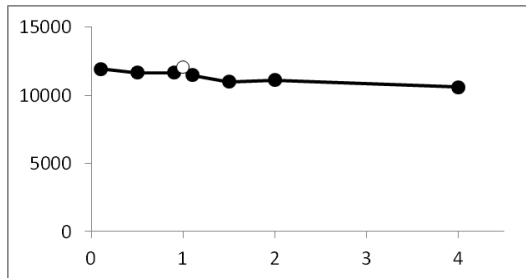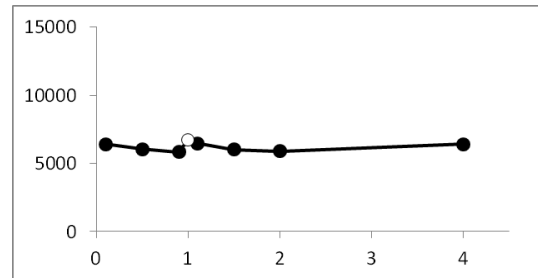

(liv) "TIME\_NECTAR\_GATHERING" (default time = 1200 seconds)

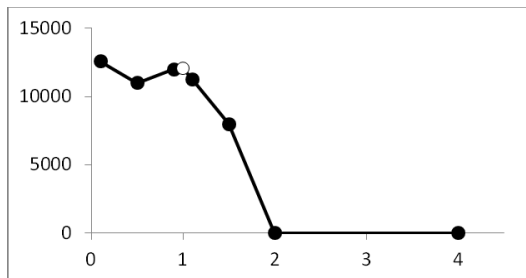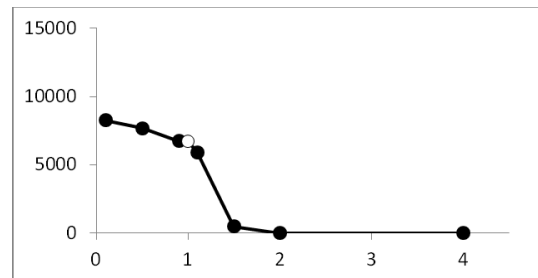

(lv) "TIME\_POLLEN\_GATHERING" (default time = 600 seconds)

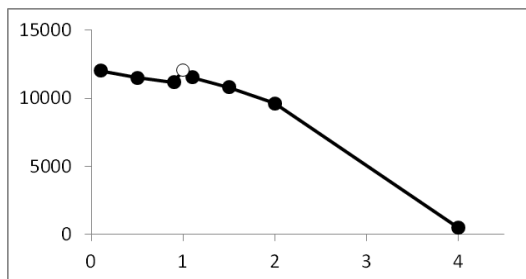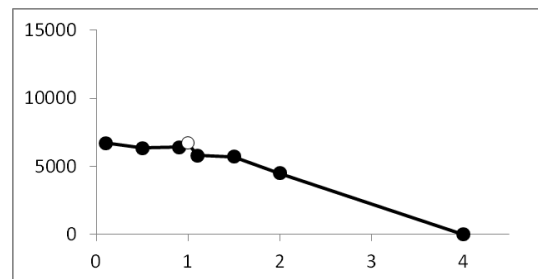

(lvi) "TIME\_UNLOADING" (default time = 116 seconds)

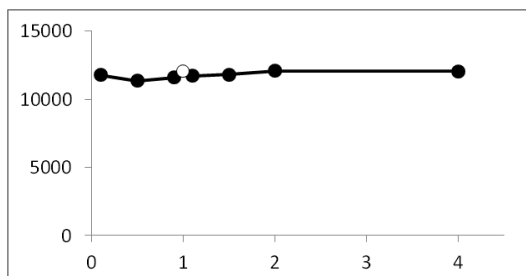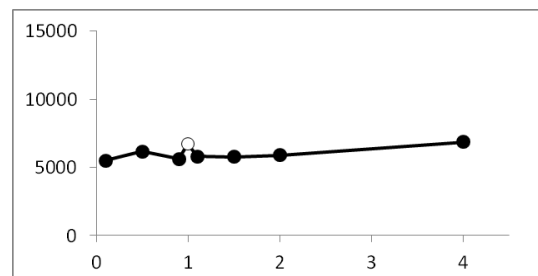

## Appendix S4

Without varroa

With varroa

(lvii) "TIME\_UNLOADING\_POLLEN" (default time = 210 seconds)

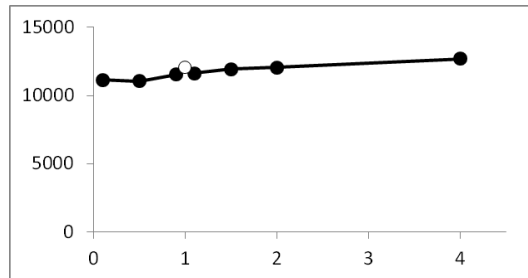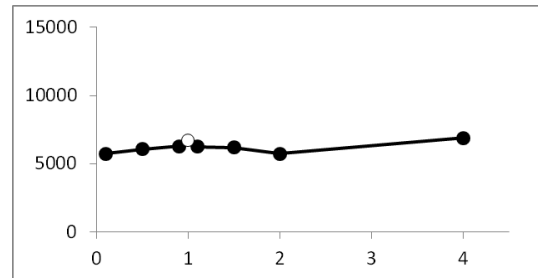

### VIRUS SPECIFIC PARAMETERS (Deformed Wing Virus):

(lviii) "MORTALITY\_INHIVE\_INFECTED\_AS\_PUPA" (default mortality = 0.012 per day)

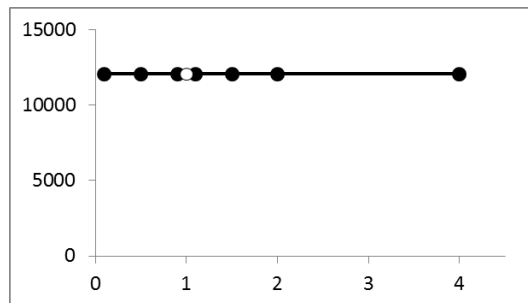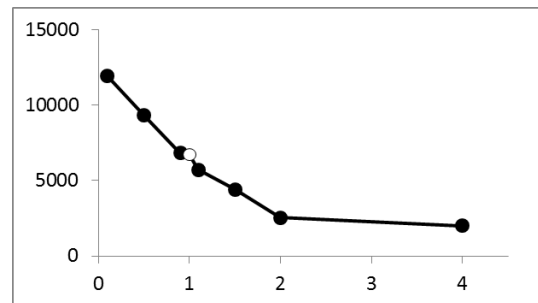

(lix) "VIRUS\_KILLS\_PUPA\_PROB" (default probability = 0.2)

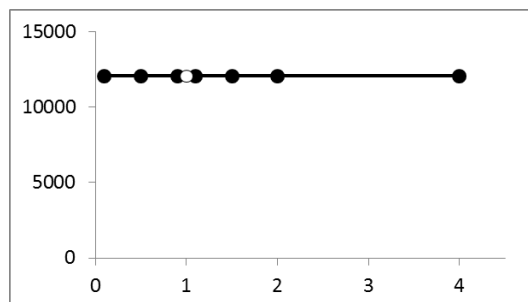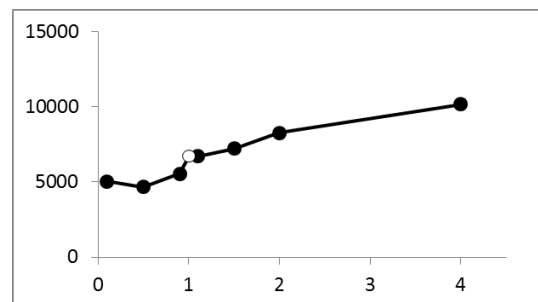

(lx) "VIRUS\_TRANSMISSION\_RATE\_MITE\_TO\_PUPA" (default probability = 0.89)

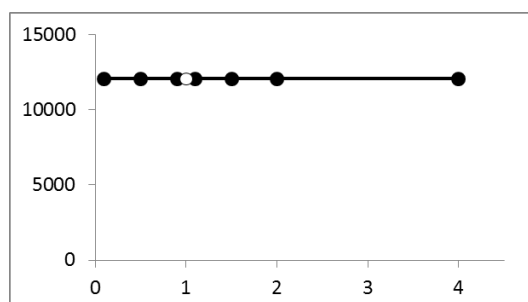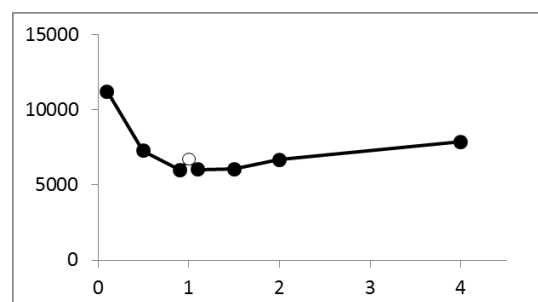

## Appendix S4

Without varroa

With varroa

(lxi) "VIRUS\_TRANSMISSION\_RATE\_PUPA\_TO\_MITES" (default probability = 1)

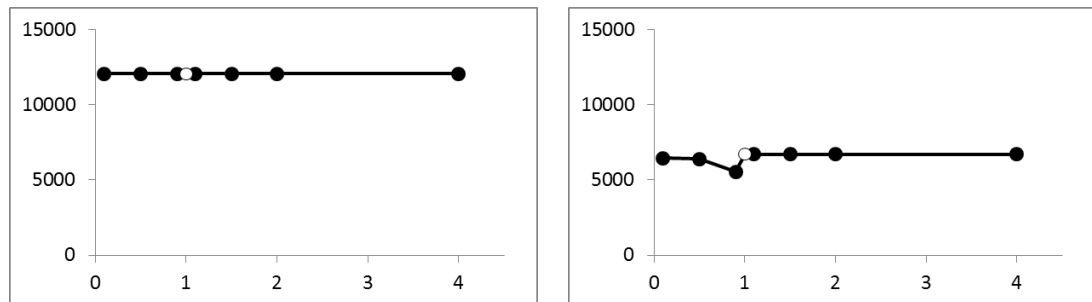

**Impact of the number of foragers per super-individual:**

(lxii) "SQUADRON\_SIZE" (only without varroa) (default number of bees = 100)

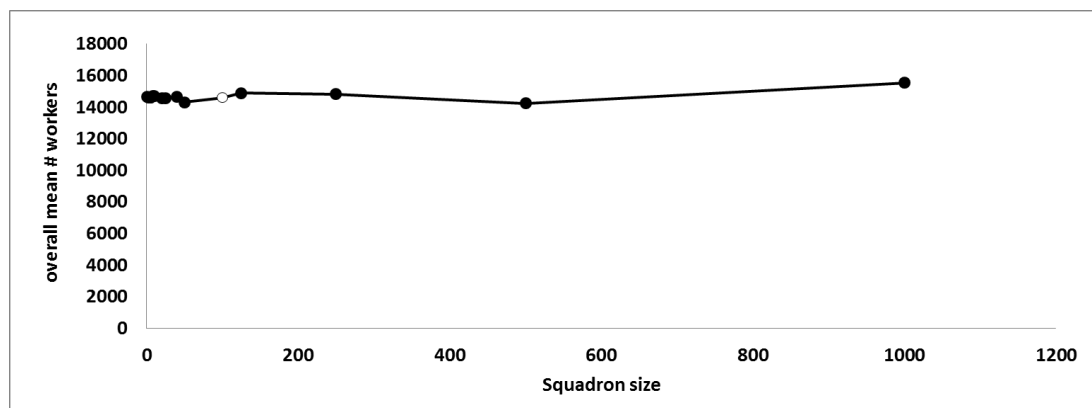

**Parameters not included, as they require integer values:**

"DRONE\_EMERGING\_AGE"  
"DRONE\_HATCHING\_AGE"  
"DRONE\_PUPATION\_AGE"  
"EMERGING\_AGE"  
"HATCHING\_AGE"  
"MAX\_AFF"  
"MIN\_AFF"  
"PUPATION\_AGE"

**Parameters not included, as their default value is 0:**

"DANCE\_INTERCEPT"  
("N\_INITIAL\_MITES\_HEALTHY")  
("N\_INITIAL\_MITES\_INFECTED")  
"POST\_SWARMING\_PERIOD"

**Parameters not included for other reasons (e.g. because they are constants or do not affect the modelled processes):**

"ENERGY\_HONEY\_per\_g"  
"ENERGY\_SUCROSE"  
"INPUT\_FILE"  
"MAX\_BROODCELLS"  
"MAX\_km\_PER\_DAY"  
"N\_FLOWERPATCHES"  
"N\_GENERIC\_PLOTS"  
"PATCHCOLOR"  
"SEASON\_START"  
"SEASON\_STOP"  
"STEPWIDTH"  
"STEPWIDTHdrones"  
"WEIGHT\_WORKER\_g"
